# Supplementary material for: Duplication and Remolding of tRNA Genes in the Mitochondrial Genome of Reduvius tenebrosus (Hemiptera: Reduviidae)
Source: PubMed Central journal article supplement (PMC4926484; doi:10.3390/ijms17060951), 2016-06-16
Supplement: ijms-17-00951-s001.pdf [file ijms-17-00951-s001.pdf]

# Supplementary Materials: Duplication and Remolding of tRNA Genes in the Mitochondrial Genome of *Reduvius tenebrosus* (Hemiptera: Reduviidae)

Pei Jiang, Hu Li, Fan Song, Yao Cai, Jianyun Wang, Jinpeng Liu and Wanzhi Cai

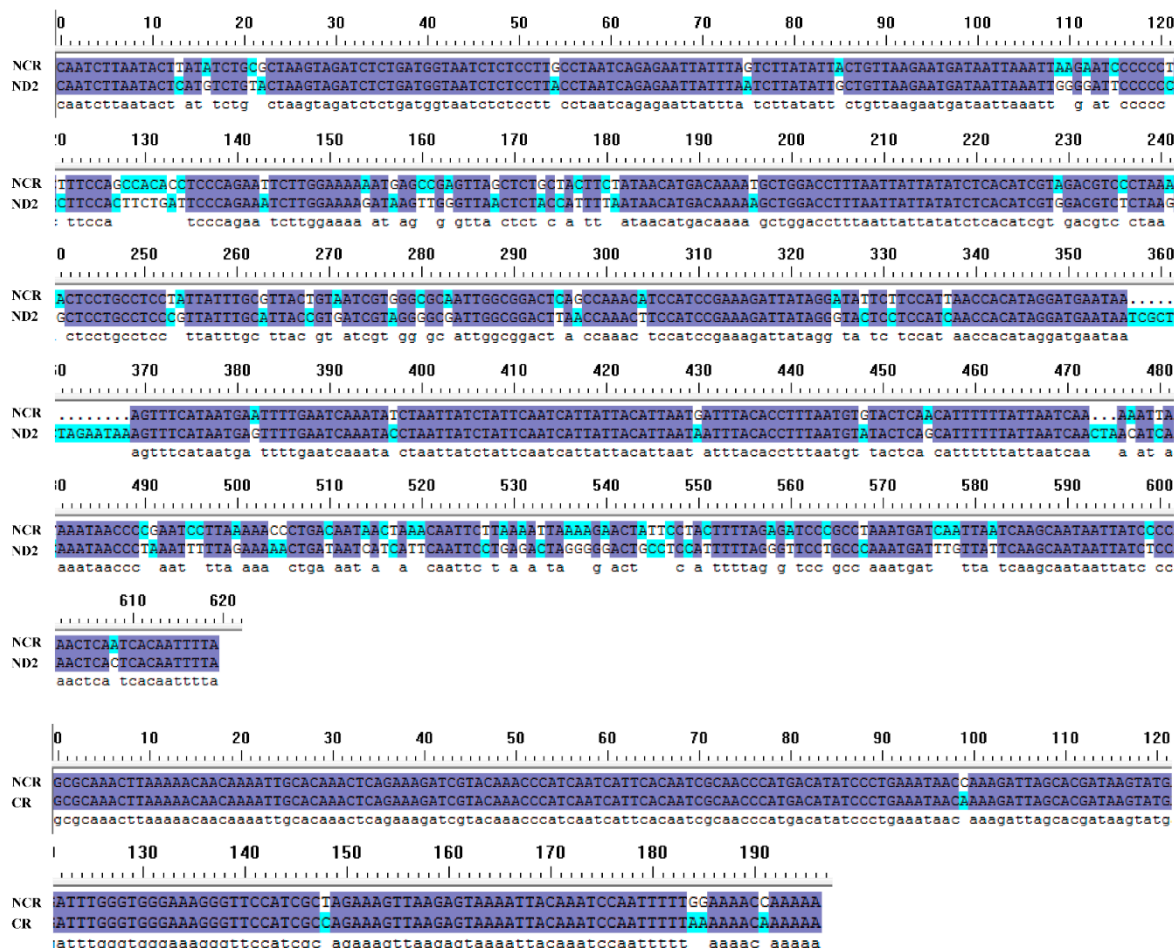

**Figure S1.** Sequence matching between the non-coding regions (NCR) parts and ND2 and control region (CR). The identical bases between two sequences are in navy blue and the white and sky blue ones indicate different bases between them.

**Table S1.** Organization of *Reduvius tenebrosus* mitochondrial (mt) genome. “F” indicates genes encoded on the majority strand and “R” indicates genes annotated on the minority strand. “T-” stands for the incomplete stop codon (a single T).

| Gene         | Direction | Location | Size | Anticodon | Codon Start | Codon Stop | Intergenic Nucleotides |
|--------------|-----------|----------|------|-----------|-------------|------------|------------------------|
| <i>trnI1</i> | F         | 1        | 64   | GAT       |             |            | 0                      |
| <i>trnM</i>  | F         | 107      | 175  | CAT       |             |            | 42                     |
| <i>ND2</i>   | F         | 176      | 1177 |           | ATC         | TAA        | 0                      |
| <i>trnW</i>  | F         | 1176     | 1240 | TCA       |             |            | -2                     |
| <i>trnC</i>  | R         | 1233     | 1294 | GCA       |             |            | -8                     |
| <i>trnY</i>  | R         | 1303     | 1368 | GTA       |             |            | 8                      |
| <i>COI</i>   | F         | 1372     | 2905 |           | ATG         | T-         | 3                      |

Table S1. Cont.

| Gene           | Direction | Location | Size   | Anticodon | Codon Start | Codon Stop | Intergenic Nucleotides |
|----------------|-----------|----------|--------|-----------|-------------|------------|------------------------|
| <i>trnL2</i>   | F         | 2906     | 2970   | 65        | TAA         |            | 0                      |
| <i>COII</i>    | F         | 2971     | 3654   | 684       | ATT         | TAA        | 0                      |
| <i>trnK</i>    | F         | 3672     | 3741   | 70        | CTT         |            | 17                     |
| <i>trnD</i>    | F         | 3742     | 3804   | 63        | GTC         |            | 0                      |
| <i>ATP8</i>    | F         | 3805     | 3963   | 159       | ATT         | TAA        | 0                      |
| <i>ATP6</i>    | F         | 3957     | 4640   | 684       | ATG         | TAG        | -7                     |
| <i>COIII</i>   | F         | 4627     | 5413   | 787       | ATG         | T-         | -14                    |
| <i>trnG</i>    | F         | 5414     | 5475   | 62        | TCC         |            | 0                      |
| <i>ND3</i>     | F         | 5476     | 5829   | 354       | ATA         | TAG        | 0                      |
| <i>trnA</i>    | F         | 5829     | 5888   | 60        | TGC         |            | -1                     |
| <i>trnR</i>    | F         | 5891     | 5954   | 64        | TCG         |            | 2                      |
| <i>trnN</i>    | F         | 6058     | 6124   | 67        | GTT         |            | 103                    |
| <i>trnS1</i>   | F         | 6124     | 6192   | 69        | GCT         |            | -1                     |
| <i>trnE</i>    | F         | 6194     | 6258   | 65        | TTC         |            | 1                      |
| <i>trnF</i>    | R         | 6257     | 6323   | 67        | GAA         |            | -2                     |
| <i>ND5</i>     | R         | 6324     | 8034   | 1711      | ATT         | T-         | 0                      |
| <i>trnH</i>    | R         | 8035     | 8096   | 62        | GTG         |            | 0                      |
| <i>ND4</i>     | R         | 8097     | 9423   | 1327      | ATG         | T-         | 0                      |
| <i>ND4L</i>    | R         | 9417     | 9713   | 297       | GTG         | TAA        | -7                     |
| <i>trnT</i>    | F         | 9716     | 9776   | 61        | TGT         |            | 2                      |
| <i>trnP</i>    | R         | 9777     | 9842   | 66        | TGG         |            | 0                      |
| <i>ND6</i>     | F         | 9845     | 10,345 | 501       | ATT         | TAA        | 2                      |
| <i>CytB</i>    | F         | 10,345   | 11,481 | 1137      | ATG         | TAA        | -1                     |
| <i>trnS2</i>   | F         | 11,480   | 11,550 | 71        | TGA         |            | -2                     |
| <i>ND1</i>     | R         | 11,696   | 12,613 | 918       | GTG         | TAG        | 145                    |
| <i>trnL1</i>   | R         | 12,614   | 12,678 | 65        | TAG         |            | 0                      |
| <i>lrRNA</i>   | R         | 12,679   | 13,933 | 1255      |             |            | 0                      |
| <i>trnV</i>    | R         | 13,934   | 14,001 | 68        | TAC         |            | 0                      |
| <i>srRNA</i>   | R         | 14,002   | 14,785 | 784       |             |            | 0                      |
| control region | F         | 14,786   | 16,036 | 1251      |             |            | 0                      |
| <i>trnQ</i>    | R         | 16,037   | 16,105 | 69        | TTG         |            | 0                      |
| <i>trnI2</i>   | F         | 16,105   | 16,173 | 69        | GAT         |            | -1                     |
| NCR            | F         | 16,174   | 17,090 | 917       |             |            | 0                      |

Table S2. Base composition in *R. tenebrosus* mt genome.

| Feature                | Total  | %T   | %C   | %A   | %G   | %A+T | %G+C | AT-Skew | GC-Skew |
|------------------------|--------|------|------|------|------|------|------|---------|---------|
| Whole genome           | 17,090 | 27.5 | 20.4 | 39.7 | 12.5 | 67.2 | 32.8 | 0.18    | -0.24   |
| Protein-coding genes   | 11,064 | 38.2 | 17.8 | 27.6 | 16.5 | 65.8 | 34.2 | -0.16   | -0.04   |
| First codon position   | 3688   | 31.9 | 15.9 | 31.5 | 20.7 | 63.4 | 36.6 | -0.01   | 0.13    |
| Second codon position  | 3688   | 45.9 | 19.3 | 18.8 | 16.1 | 64.7 | 35.3 | -0.42   | -0.09   |
| Third codon position   | 3688   | 36.7 | 18.1 | 32.5 | 12.6 | 69.2 | 30.8 | -0.06   | -0.18   |
| Protein-coding genes-J | 6819   | 30.6 | 22   | 32.8 | 14.6 | 63.4 | 36.6 | 0.03    | -0.20   |
| First codon position   | 2273   | 24.3 | 19.4 | 35.5 | 20.7 | 59.8 | 40.2 | 0.19    | 0.03    |
| Second codon position  | 2273   | 43.6 | 21.4 | 20.1 | 15   | 63.7 | 36.3 | -0.37   | -0.18   |
| Third codon position   | 2273   | 23.9 | 25   | 42.8 | 8.2  | 66.7 | 33.3 | 0.28    | -0.51   |
| Protein-coding genes-N | 4245   | 50.3 | 11.1 | 19.2 | 19.4 | 69.5 | 30.5 | -0.45   | 0.27    |
| First codon position   | 1415   | 44.1 | 10.2 | 25.1 | 20.6 | 69.2 | 30.8 | -0.27   | 0.34    |
| Second codon position  | 1415   | 49.5 | 15.9 | 16.7 | 17.9 | 66.2 | 33.8 | -0.50   | 0.06    |
| Third codon position   | 1415   | 57.3 | 7.1  | 15.9 | 19.7 | 73.2 | 26.8 | -0.57   | 0.47    |
| Control region         | 1251   | 28.9 | 21.7 | 37.2 | 12.2 | 66.1 | 33.9 | 0.13    | -0.28   |

**Table S3.** Structural features and codon usage for isoleucine (Ile) of sequenced assassin bug mt genomes.

| Subfamily         | Species                         | Rearrangement | Length (bp) | AT %  | Codons for Ile |       |           | GenBank Accession |
|-------------------|---------------------------------|---------------|-------------|-------|----------------|-------|-----------|-------------------|
|                   |                                 |               |             |       | ATT            | ATC   | ATT + ATC |                   |
| Triatominae       | <i>Triatoma dimidiata</i>       | none          | 17,019      | 69.5% | 281 *          | 81 *  | 362       | NC_002609         |
| Salyavatinae      | <i>Valentia hoffmanni</i>       | none          | 15,625      | 73.7% | 325            | 41    | 366       | NC_012823         |
| Harpactorinae     | <i>Agriosphodrus dohrni</i>     | none          | 16,470      | 72.2% | 313            | 48    | 361       | NC_015842         |
| Ectrichodiinae    | <i>Brontostoma colossus</i>     | A-R-N→R-A-R-N | 16,625      | 73.4% | 328            | 56    | 384       | NC_024745         |
| Peiratinae        | <i>Sirthena flavipes</i>        | none          | 15,961      | 71.8% | 328            | 51    | 379       | NC_020143         |
| Peiratinae        | <i>Peirates arcuatus</i>        | none          | 16,176      | 71.3% | 343 *          | 42 *  | 385       | NC_024264         |
| Peiratinae        | <i>Peirates fulvoescens</i>     | none          | 15,702      | 71.9% | 318            | 53    | 371       | KF913537          |
| Peiratinae        | <i>Peirates atromaculatus</i>   | none          | 16,151      | 71.0% | 309            | 61    | 370       | KF913539          |
| Peiratinae        | <i>Peirates turpis</i>          | none          | 15,703      | 72.0% | 312            | 58    | 370       | KF913540          |
| Peiratinae        | <i>Peirates lepturoides</i>     | none          | 15,932      | 72.4% | 329            | 59    | 388       | KF913541          |
| Stenopodinae      | <i>Oncocephalus breviscutum</i> | none          | 15,948      | 74.4% | 367 *          | 24 *  | 391       | NC_022816         |
| Tribelocephalinae | <i>Opistoplatys</i> sp.         | none          | 15,615      | 75.6% | 383 *          | 38 *  | 421       | KC887533          |
| Reduviinae        | <i>Reduvius tenebrosus</i>      | I-Q-M→Q-I-I-M | 17,090      | 67.2% | 251 *          | 114 * | 365       | present study     |

Values with an asterisk signify that relative frequency of codons for ATT vs. ATC is significantly ( $p < 0.05$ ) different from the averaged among 13 assassin bugs.

**Table S4.** Codon usage of protein-coding genes in the *R. tenebrosus* mt genome.

| Amino Acid | Codon      | N          | RSCU        | N+         | RSCU        | N-         | RSCU        |
|------------|------------|------------|-------------|------------|-------------|------------|-------------|
| Phe (F)    | <b>UUU</b> | <b>235</b> | <b>1.41</b> | 78         | 0.97        | <b>157</b> | <b>1.83</b> |
|            | <u>UUC</u> | 98         | 0.59        | <b>83</b>  | <b>1.03</b> | 15         | 0.17        |
| Leu (L)    | <b>UUA</b> | <b>186</b> | <b>2.08</b> | 87         | 1.83        | <b>99</b>  | <b>2.37</b> |
|            | UUG        | 103        | 1.15        | 12         | 0.25        | 91         | 2.18        |
|            | CUU        | 76         | 0.85        | 32         | 0.67        | 44         | 1.05        |
|            | CUC        | 41         | 0.46        | 39         | 0.82        | 2          | 0.05        |
|            | CUA        | 104        | 1.16        | <b>94</b>  | <b>1.97</b> | 10         | 0.24        |
|            | CUG        | 27         | 0.30        | 22         | 0.46        | 5          | 0.12        |
| Ile (I)    | <b>AUU</b> | <b>251</b> | <b>1.38</b> | <b>155</b> | <b>1.21</b> | <b>96</b>  | <b>1.76</b> |
|            | <u>AUC</u> | 114        | 0.62        | 101        | 0.79        | 13         | 0.24        |
| Met (M)    | <b>AUA</b> | <b>184</b> | <b>1.47</b> | <b>147</b> | <b>1.74</b> | 37         | 0.91        |
|            | <u>AUG</u> | 66         | 0.53        | 22         | 0.26        | <b>44</b>  | <b>1.09</b> |
| Val(V)     | GUU        | 89         | 1.72        | 30         | 1.01        | <b>59</b>  | <b>2.68</b> |
|            | GUC        | 24         | 0.46        | 17         | 0.57        | 7          | 0.32        |
|            | <u>GUA</u> | <b>66</b>  | <b>1.28</b> | <b>57</b>  | <b>1.92</b> | 9          | 0.41        |
|            | GUG        | 28         | 0.54        | 15         | 0.50        | 13         | 0.59        |
| Ser (S)    | <b>UCU</b> | <b>106</b> | <b>2.25</b> | 23         | 0.88        | <b>83</b>  | <b>3.88</b> |
|            | UCC        | 48         | 1.02        | 39         | 1.50        | 9          | 0.42        |
|            | <u>UCA</u> | 71         | 1.51        | <b>63</b>  | <b>2.42</b> | 8          | 0.37        |
|            | UCG        | 7          | 0.15        | 2          | 0.08        | 5          | 0.23        |
| Pro (P)    | <b>CCU</b> | <b>60</b>  | <b>1.71</b> | 31         | 1.16        | <b>29</b>  | <b>3.52</b> |
|            | CCC        | 39         | 1.11        | <b>36</b>  | <b>1.35</b> | 3          | 0.36        |
|            | <u>CCA</u> | 36         | 1.03        | 35         | 1.31        | 1          | 0.12        |
|            | CCG        | 5          | 0.14        | 5          | 0.19        | 0          | 0.00        |
| Thr (T)    | <b>ACU</b> | <b>69</b>  | <b>1.56</b> | 35         | 1.01        | <b>34</b>  | <b>3.58</b> |
|            | ACC        | 24         | 0.54        | 23         | 0.66        | 1          | 0.11        |
|            | <u>ACA</u> | 74         | 1.67        | <b>73</b>  | <b>2.10</b> | 1          | 0.11        |
|            | ACG        | 10         | 0.23        | 8          | 0.23        | 2          | 0.21        |
| Ala (A)    | GCU        | 49         | 1.21        | 16         | 0.57        | <b>33</b>  | <b>2.69</b> |
|            | GCC        | 38         | 0.94        | 31         | 1.10        | 7          | 0.57        |
|            | <u>GCA</u> | <b>65</b>  | <b>1.60</b> | <b>62</b>  | <b>2.19</b> | 3          | 0.24        |
|            | GCG        | 10         | 0.25        | 4          | 0.14        | 6          | 0.49        |
| Tyr (Y)    | <b>UAU</b> | <b>108</b> | <b>1.32</b> | 31         | 0.81        | <b>77</b>  | <b>1.77</b> |
|            | <u>UAC</u> | 56         | 0.68        | <b>46</b>  | <b>1.19</b> | 10         | 0.23        |

Table S4. Cont.

| Amino Acid | Codon      | N         | RSCU        | N+        | RSCU        | N-        | RSCU        |
|------------|------------|-----------|-------------|-----------|-------------|-----------|-------------|
| Stop (*)   | UAA        | 6         |             |           |             |           |             |
|            | UAG        | 3         |             |           |             |           |             |
| His (H)    | <b>CAU</b> | <b>37</b> | <b>0.99</b> | 26        | 0.85        | <b>11</b> | <b>1.57</b> |
|            | <u>CAC</u> | 38        | 1.01        | <b>35</b> | <b>1.15</b> | 3         | 0.43        |
| Gln (Q)    | <u>CAA</u> | <b>44</b> | <b>1.28</b> | <b>41</b> | <b>1.58</b> | 3         | 0.35        |
|            | CAG        | 25        | 0.72        | 11        | 0.42        | <b>14</b> | <b>1.65</b> |
| Asn (N)    | <b>AAU</b> | <b>71</b> | <b>1.08</b> | 35        | 0.75        | <b>36</b> | <b>1.85</b> |
|            | <u>AAC</u> | 61        | 0.92        | <b>58</b> | <b>1.25</b> | 3         | 0.15        |
| Lys (K)    | <b>AAA</b> | <b>54</b> | <b>1.19</b> | <b>51</b> | <b>1.48</b> | 3         | 0.27        |
|            | <u>AAG</u> | 37        | 0.81        | 18        | 0.52        | <b>19</b> | <b>1.73</b> |
| Asp (D)    | <b>GAU</b> | <b>54</b> | <b>1.38</b> | <b>26</b> | <b>1.11</b> | <b>28</b> | <b>1.81</b> |
|            | <u>GAC</u> | 24        | 0.62        | 21        | 0.89        | 3         | 0.19        |
| Glu (E)    | <u>GAA</u> | <b>53</b> | <b>1.28</b> | <b>47</b> | <b>1.65</b> | 6         | 0.46        |
|            | GAG        | 30        | 0.72        | 10        | 0.35        | <b>20</b> | <b>1.54</b> |
| Cys (C)    | <b>UGU</b> | <b>38</b> | <b>1.36</b> | 5         | 0.56        | <b>33</b> | <b>1.74</b> |
|            | <u>UGC</u> | 18        | 0.64        | <b>13</b> | <b>1.44</b> | 5         | 0.26        |
| Trp (W)    | <u>UGA</u> | <b>74</b> | <b>1.44</b> | <b>58</b> | <b>1.63</b> | <b>16</b> | <b>1.00</b> |
|            | UGG        | 29        | 0.56        | 13        | 0.37        | <b>16</b> | <b>1.00</b> |
| Arg (R)    | CGU        | 17        | 0.68        | 3         | 0.34        | <b>14</b> | <b>2.80</b> |
|            | CGC        | 4         | 0.16        | 3         | 0.34        | 1         | 0.20        |
|            | <u>CGA</u> | <b>26</b> | <b>1.03</b> | <b>24</b> | <b>2.74</b> | 2         | 0.40        |
|            | CGG        | 8         | 0.32        | 5         | 0.57        | 3         | 0.60        |
| Ser (S)    | AGU        | 36        | 0.76        | 9         | 0.35        | 27        | 1.26        |
|            | <u>AGC</u> | 15        | 0.32        | 9         | 0.35        | 6         | 0.28        |
|            | AGA        | 82        | 3.26        | 61        | 2.35        | 21        | 0.98        |
| Gly (G)    | AGG        | 14        | 0.56        | 2         | 0.08        | 12        | 0.56        |
|            | GGU        | 59        | 1.02        | 9         | 0.27        | <b>50</b> | <b>2.06</b> |
|            | GGC        | 27        | 0.47        | 15        | 0.44        | 12        | 0.49        |
|            | <u>GGA</u> | <b>79</b> | <b>1.36</b> | <b>73</b> | <b>2.16</b> | 6         | 0.25        |
|            | GGG        | 67        | 1.16        | 38        | 1.13        | 29        | 1.20        |

N, the number of codons used in protein-coding genes; RSCU, relative synonymous codon usage. Values in bold type stand for the most commonly used codon for amino acid. Underlined stand for the cognate codon of tRNA for each amino acid.

**Table S5.** Codon usage of protein-coding genes in 13 sequenced assassin bug mt genomes.

| Species                         | Phe |     |      | Leu |     |     |     |     |     |      | Ile |     |      | Met |     |      | Val |     |     |     |      |
|---------------------------------|-----|-----|------|-----|-----|-----|-----|-----|-----|------|-----|-----|------|-----|-----|------|-----|-----|-----|-----|------|
|                                 | UUU | UUC | %    | UUA | UUG | CUU | CUC | CUA | CUG | %    | AUU | AUC | %    | AUA | AUG | %    | GUU | GUC | GUA | GUG | %    |
| <i>Triatoma dimidiata</i>       | 250 | 85  | 0.25 | 219 | 95  | 89  | 31  | 81  | 10  | 0.26 | 281 | 81  | 0.22 | 193 | 58  | 0.23 | 113 | 21  | 76  | 19  | 0.17 |
| <i>Valentia hoffmanni</i>       | 292 | 55  | 0.16 | 323 | 52  | 82  | 9   | 53  | 7   | 0.13 | 325 | 41  | 0.11 | 250 | 31  | 0.11 | 92  | 9   | 86  | 9   | 0.09 |
| <i>Agriosphodrus dohrni</i>     | 282 | 71  | 0.20 | 298 | 51  | 78  | 22  | 55  | 17  | 0.17 | 313 | 48  | 0.13 | 222 | 39  | 0.15 | 83  | 19  | 82  | 19  | 0.19 |
| <i>Brontostoma colossus</i>     | 276 | 82  | 0.23 | 295 | 74  | 54  | 10  | 68  | 10  | 0.18 | 328 | 56  | 0.15 | 247 | 43  | 0.15 | 90  | 13  | 58  | 7   | 0.12 |
| <i>Sirthenea flavipes</i>       | 283 | 62  | 0.18 | 264 | 68  | 67  | 17  | 82  | 11  | 0.19 | 328 | 51  | 0.13 | 217 | 64  | 0.23 | 91  | 20  | 78  | 16  | 0.18 |
| <i>Peirates arcuatus</i>        | 278 | 64  | 0.19 | 275 | 56  | 76  | 15  | 68  | 18  | 0.18 | 343 | 42  | 0.11 | 209 | 50  | 0.19 | 91  | 15  | 78  | 15  | 0.15 |
| <i>Peirates fulvescens</i>      | 269 | 75  | 0.22 | 331 | 61  | 56  | 22  | 46  | 10  | 0.18 | 318 | 53  | 0.14 | 216 | 49  | 0.18 | 106 | 11  | 74  | 17  | 0.13 |
| <i>Peirates atromaculatus</i>   | 276 | 69  | 0.20 | 330 | 60  | 60  | 17  | 50  | 9   | 0.16 | 309 | 61  | 0.16 | 214 | 51  | 0.19 | 102 | 15  | 75  | 17  | 0.15 |
| <i>Peirates turpis</i>          | 273 | 71  | 0.21 | 332 | 60  | 60  | 17  | 46  | 12  | 0.17 | 312 | 58  | 0.16 | 214 | 58  | 0.21 | 103 | 15  | 74  | 17  | 0.15 |
| <i>Peirates lepturoides</i>     | 289 | 54  | 0.16 | 315 | 49  | 75  | 12  | 54  | 9   | 0.14 | 329 | 59  | 0.15 | 221 | 47  | 0.18 | 106 | 12  | 71  | 7   | 0.10 |
| <i>Oncocephalus breviscutum</i> | 287 | 61  | 0.18 | 325 | 45  | 84  | 9   | 35  | 6   | 0.12 | 367 | 24  | 0.06 | 251 | 22  | 0.08 | 94  | 5   | 74  | 13  | 0.10 |
| <i>Opistoplatys sp.</i>         | 313 | 43  | 0.12 | 367 | 38  | 57  | 10  | 33  | 2   | 0.10 | 383 | 38  | 0.09 | 255 | 29  | 0.10 | 71  | 11  | 68  | 11  | 0.14 |
| <i>Reduvius tenebrosus</i>      | 235 | 98  | 0.29 | 186 | 103 | 76  | 41  | 104 | 27  | 0.32 | 251 | 114 | 0.31 | 184 | 66  | 0.26 | 89  | 24  | 66  | 28  | 0.25 |
| Average                         | 277 | 68  | 0.20 | 297 | 62  | 70  | 18  | 60  | 11  | 0.18 | 322 | 56  | 0.15 | 223 | 47  | 0.17 | 95  | 15  | 74  | 15  | 0.15 |

| Species                 | Ser |     |     |     |      | Pro |     |     |     |      | Thr |     |     | Ala |      |     |     | Tyr |     |      |     |     |      |
|-------------------------|-----|-----|-----|-----|------|-----|-----|-----|-----|------|-----|-----|-----|-----|------|-----|-----|-----|-----|------|-----|-----|------|
|                         | UCU | UCC | UCA | UCG | %    | CCU | CCC | CCA | CCG | %    | ACU | ACC | ACA | ACG | %    | GCU | GCC | GCA | GCG | %    | UAU | UAC | %    |
| <i>T. dimidiata</i>     | 130 | 26  | 76  | 3   | 0.12 | 67  | 21  | 41  | 4   | 0.19 | 77  | 37  | 69  | 5   | 0.22 | 60  | 35  | 61  | 4   | 0.24 | 130 | 37  | 0.22 |
| <i>V. hoffmanni</i>     | 108 | 28  | 101 | 2   | 0.13 | 69  | 19  | 45  | 0   | 0.14 | 76  | 16  | 92  | 2   | 0.10 | 65  | 15  | 60  | 2   | 0.12 | 138 | 22  | 0.14 |
| <i>A. dohrni</i>        | 110 | 22  | 88  | 2   | 0.11 | 54  | 22  | 47  | 2   | 0.19 | 97  | 25  | 80  | 5   | 0.14 | 56  | 23  | 67  | 5   | 0.19 | 137 | 38  | 0.22 |
| <i>B. colossus</i>      | 108 | 22  | 85  | 9   | 0.14 | 63  | 20  | 51  | 5   | 0.18 | 61  | 23  | 101 | 7   | 0.16 | 48  | 12  | 55  | 3   | 0.13 | 145 | 29  | 0.17 |
| <i>S. flavipes</i>      | 129 | 18  | 77  | 6   | 0.10 | 53  | 25  | 53  | 8   | 0.24 | 76  | 15  | 89  | 6   | 0.11 | 66  | 20  | 54  | 4   | 0.17 | 136 | 33  | 0.20 |
| <i>P. arcuatus</i>      | 117 | 27  | 77  | 8   | 0.15 | 52  | 33  | 50  | 4   | 0.27 | 79  | 21  | 87  | 5   | 0.14 | 46  | 29  | 68  | 3   | 0.22 | 139 | 28  | 0.17 |
| <i>P. fulvescens</i>    | 121 | 18  | 83  | 8   | 0.11 | 63  | 25  | 50  | 3   | 0.20 | 65  | 22  | 93  | 3   | 0.14 | 42  | 21  | 79  | 5   | 0.18 | 138 | 24  | 0.15 |
| <i>P. atromaculatus</i> | 123 | 18  | 84  | 5   | 0.10 | 63  | 26  | 53  | 3   | 0.20 | 66  | 20  | 96  | 1   | 0.11 | 41  | 21  | 78  | 5   | 0.18 | 140 | 23  | 0.14 |
| <i>P. turpis</i>        | 124 | 16  | 85  | 6   | 0.10 | 62  | 27  | 52  | 3   | 0.21 | 66  | 20  | 95  | 2   | 0.12 | 42  | 19  | 78  | 5   | 0.17 | 140 | 23  | 0.14 |
| <i>P. lepturoides</i>   | 123 | 12  | 94  | 2   | 0.06 | 74  | 17  | 50  | 3   | 0.14 | 77  | 16  | 84  | 1   | 0.10 | 55  | 19  | 82  | 4   | 0.14 | 140 | 24  | 0.15 |
| <i>O. breviscutum</i>   | 125 | 20  | 86  | 6   | 0.11 | 70  | 8   | 56  | 2   | 0.07 | 71  | 17  | 91  | 5   | 0.12 | 66  | 15  | 49  | 6   | 0.15 | 161 | 11  | 0.06 |
| <i>Opistoplatys sp.</i> | 105 | 23  | 80  | 4   | 0.13 | 71  | 16  | 41  | 7   | 0.17 | 77  | 22  | 58  | 5   | 0.17 | 53  | 26  | 54  | 4   | 0.22 | 171 | 14  | 0.08 |
| <i>R. tenebrosus</i>    | 106 | 48  | 71  | 7   | 0.24 | 60  | 39  | 36  | 5   | 0.31 | 69  | 24  | 74  | 10  | 0.19 | 49  | 38  | 65  | 10  | 0.30 | 108 | 56  | 0.34 |
| Average                 | 118 | 23  | 84  | 5   | 0.12 | 63  | 23  | 48  | 4   | 0.19 | 74  | 21  | 85  | 4   | 0.14 | 53  | 23  | 65  | 5   | 0.19 | 140 | 28  | 0.17 |

| Species                  | His |     |      | Gln |     |      | Asn |     |      | Lys |     |      | Asp |     |      | Glu |     |      | Cys |     |      |
|--------------------------|-----|-----|------|-----|-----|------|-----|-----|------|-----|-----|------|-----|-----|------|-----|-----|------|-----|-----|------|
|                          | CAU | CAC | %    | CAA | CAG | %    | AAU | AAC | %    | AAA | AAG | %    | GAU | GAC | %    | GAA | GAG | %    | UGU | UGC | %    |
| <i>T. dimidiata</i>      | 49  | 30  | 0.38 | 48  | 9   | 0.16 | 105 | 44  | 0.30 | 50  | 35  | 0.41 | 48  | 25  | 0.34 | 61  | 26  | 0.30 | 41  | 14  | 0.25 |
| <i>V. hoffmanni</i>      | 58  | 21  | 0.27 | 57  | 5   | 0.08 | 130 | 29  | 0.18 | 69  | 24  | 0.26 | 54  | 13  | 0.19 | 63  | 20  | 0.24 | 47  | 10  | 0.18 |
| <i>A. dohrni</i>         | 55  | 24  | 0.30 | 47  | 16  | 0.25 | 130 | 40  | 0.24 | 69  | 39  | 0.36 | 54  | 21  | 0.28 | 70  | 21  | 0.23 | 53  | 1   | 0.02 |
| <i>B. colossus</i>       | 55  | 22  | 0.29 | 47  | 9   | 0.16 | 128 | 38  | 0.23 | 92  | 15  | 0.14 | 54  | 15  | 0.22 | 58  | 12  | 0.17 | 56  | 6   | 0.10 |
| <i>S. flavipes</i>       | 46  | 31  | 0.40 | 47  | 10  | 0.18 | 115 | 42  | 0.27 | 68  | 32  | 0.32 | 52  | 23  | 0.31 | 68  | 20  | 0.23 | 34  | 18  | 0.35 |
| <i>P. arcuatus</i>       | 59  | 17  | 0.22 | 47  | 11  | 0.19 | 123 | 28  | 0.19 | 65  | 24  | 0.27 | 56  | 19  | 0.25 | 75  | 16  | 0.18 | 49  | 12  | 0.20 |
| <i>P. fulvescens</i>     | 49  | 30  | 0.38 | 44  | 10  | 0.19 | 117 | 34  | 0.23 | 75  | 25  | 0.25 | 57  | 18  | 0.24 | 72  | 16  | 0.18 | 52  | 8   | 0.13 |
| <i>P. atromaculatus</i>  | 47  | 30  | 0.39 | 47  | 8   | 0.15 | 117 | 34  | 0.23 | 71  | 29  | 0.29 | 56  | 19  | 0.25 | 72  | 19  | 0.21 | 51  | 9   | 0.15 |
| <i>P. turpis</i>         | 48  | 29  | 0.38 | 47  | 8   | 0.15 | 117 | 34  | 0.23 | 71  | 31  | 0.30 | 57  | 18  | 0.24 | 72  | 17  | 0.19 | 51  | 9   | 0.15 |
| <i>P. lepturoides</i>    | 51  | 27  | 0.35 | 47  | 8   | 0.15 | 125 | 26  | 0.17 | 59  | 39  | 0.40 | 64  | 12  | 0.16 | 71  | 17  | 0.19 | 46  | 12  | 0.21 |
| <i>O. breviscutum</i>    | 57  | 17  | 0.23 | 55  | 9   | 0.14 | 144 | 17  | 0.11 | 84  | 17  | 0.17 | 62  | 6   | 0.09 | 81  | 12  | 0.13 | 46  | 6   | 0.12 |
| <i>Opisthoplatys</i> sp. | 57  | 13  | 0.19 | 56  | 8   | 0.13 | 169 | 20  | 0.11 | 81  | 15  | 0.16 | 59  | 8   | 0.12 | 71  | 15  | 0.17 | 46  | 6   | 0.12 |
| <i>R. tenebrosus</i>     | 37  | 38  | 0.51 | 44  | 25  | 0.36 | 71  | 61  | 0.46 | 54  | 37  | 0.41 | 54  | 24  | 0.31 | 53  | 30  | 0.36 | 38  | 18  | 0.32 |
| Average                  | 51  | 25  | 0.33 | 49  | 10  | 0.18 | 122 | 34  | 0.22 | 70  | 28  | 0.29 | 56  | 17  | 0.23 | 68  | 19  | 0.21 | 47  | 10  | 0.17 |

| Species                  | Trp |     |      | Arg |     |     | Ser |      |     | Gly |     |     |      |     |     |     |     |      |
|--------------------------|-----|-----|------|-----|-----|-----|-----|------|-----|-----|-----|-----|------|-----|-----|-----|-----|------|
|                          | UGA | UGG | %    | CGU | CGC | CGA | CGG | %    | AGU | AGC | AGA | AGG | %    | GGU | GGC | GGA | GGG | %    |
| <i>T. dimidiata</i>      | 77  | 23  | 0.23 | 18  | 1   | 33  | 4   | 0.09 | 27  | 7   | 92  | 9   | 0.12 | 72  | 20  | 109 | 27  | 0.21 |
| <i>V. hoffmanni</i>      | 90  | 11  | 0.11 | 19  | 1   | 29  | 4   | 0.09 | 28  | 10  | 91  | 4   | 0.11 | 67  | 8   | 115 | 33  | 0.18 |
| <i>A. dohrni</i>         | 83  | 22  | 0.21 | 16  | 2   | 32  | 2   | 0.08 | 35  | 9   | 82  | 11  | 0.15 | 68  | 14  | 76  | 45  | 0.29 |
| <i>B. colossus</i>       | 78  | 16  | 0.17 | 14  | 4   | 25  | 6   | 0.20 | 34  | 9   | 72  | 8   | 0.14 | 69  | 19  | 111 | 31  | 0.22 |
| <i>S. flavipes</i>       | 88  | 14  | 0.14 | 20  | 1   | 30  | 3   | 0.07 | 33  | 8   | 85  | 3   | 0.09 | 74  | 7   | 106 | 34  | 0.19 |
| <i>P. arcuatus</i>       | 85  | 18  | 0.17 | 19  | 5   | 28  | 2   | 0.13 | 28  | 6   | 92  | 14  | 0.14 | 66  | 9   | 115 | 39  | 0.21 |
| <i>P. fulvescens</i>     | 89  | 16  | 0.15 | 16  | 2   | 32  | 4   | 0.11 | 33  | 4   | 93  | 5   | 0.07 | 81  | 12  | 96  | 34  | 0.21 |
| <i>P. atromaculatus</i>  | 86  | 17  | 0.17 | 16  | 2   | 31  | 5   | 0.13 | 31  | 6   | 94  | 5   | 0.08 | 80  | 12  | 97  | 34  | 0.21 |
| <i>P. turpis</i>         | 86  | 17  | 0.17 | 16  | 2   | 31  | 5   | 0.13 | 31  | 6   | 94  | 3   | 0.07 | 78  | 13  | 98  | 33  | 0.21 |
| <i>P. lepturoides</i>    | 90  | 13  | 0.13 | 15  | 2   | 32  | 5   | 0.13 | 31  | 5   | 89  | 7   | 0.09 | 79  | 10  | 102 | 34  | 0.20 |
| <i>O. breviscutum</i>    | 91  | 12  | 0.12 | 19  | 1   | 30  | 5   | 0.11 | 35  | 4   | 87  | 3   | 0.05 | 88  | 0   | 120 | 19  | 0.08 |
| <i>Opisthoplatys</i> sp. | 81  | 17  | 0.17 | 25  | 2   | 21  | 5   | 0.13 | 33  | 4   | 72  | 4   | 0.07 | 63  | 13  | 110 | 34  | 0.21 |
| <i>R. tenebrosus</i>     | 74  | 29  | 0.28 | 17  | 4   | 26  | 8   | 0.22 | 36  | 15  | 82  | 14  | 0.20 | 59  | 27  | 79  | 67  | 0.41 |
| Average                  | 84  | 17  | 0.17 | 18  | 2   | 29  | 4   | 0.12 | 32  | 7   | 87  | 7   | 0.11 | 73  | 13  | 103 | 36  | 0.22 |

#: The ratios of codons ending in G or C vs. total codons of each amino acid.

**Table S6.** Start and stop codons of protein-coding genes in sequenced assassin bug mt genomes.

| Gene  | Start/Stop Codon    |                     |                  |                    |                    |                    |                       |                         |                      |                      |                         |                  |                       |  |
|-------|---------------------|---------------------|------------------|--------------------|--------------------|--------------------|-----------------------|-------------------------|----------------------|----------------------|-------------------------|------------------|-----------------------|--|
|       | <i>T. dimidiata</i> | <i>V. hoffmanni</i> | <i>A. dohrni</i> | <i>S. flavipes</i> | <i>B. colossus</i> | <i>P. arcuatus</i> | <i>O. breviscutum</i> | <i>Opistoplatus sp.</i> | <i>R. tenebrosus</i> | <i>P. fulvescens</i> | <i>P. atromaculatus</i> | <i>P. turpis</i> | <i>P. lepturoides</i> |  |
| ND2   | ATC/TAG             | ATG/TAA             | ATT/TAA          | ATT/TAA            | ATT/T-             | ATG/TAA            | ATT/T-                | ATT/TAA                 | ATC/TAA              | ATG/TAA              | ATG/TAA                 | ATG/TAA          | ATG/TAA               |  |
| COI   | ATG/T-              | ATG/T-              | ATG/T-           | ATG/TAA            | ATG/T-             | ATG/T-             | ATG/T-                | ATG/TAA                 | ATG/T-               | ATG/T-               | ATG/T-                  | ATG/T-           | ATG/T-                |  |
| COII  | ATA/T-              | ATA/T-              | ATC/TAA          | ATA/TAA            | ATT/T-             | ATC/T-             | ATG/T-                | ATA/T-                  | ATT/TAA              | ATC/T-               | ATC/T-                  | ATC/T-           | ATC/T-                |  |
| ATP8  | ATA/TAA             | ATC/TAA             | ATT/TAA          | ATA/TAA            | ATT/TAA            | ATT/TAA            | ATA/TAA               | ATA/TAA                 | ATT/TAA              | ATA/TAA              | ATA/TAA                 | ATA/TAA          | ATT/TAA               |  |
| ATP6  | ATG/TAA             | ATG/TAG             | ATG/TAA          | ATG/TAG            | ATG/TAA            | ATG/TAA            | ATG/TAG               | ATG/TAA                 | ATG/TAG              | ATG/TAG              | ATG/TAG                 | ATG/TAG          | ATG/TAG               |  |
| COIII | ATG/TA-             | ATG/T-              | ATG/T-           | ATG/T-             | ATG/TAA            | ATG/T-             | ATG/T-                | ATG/T-                  | ATG/T-               | ATG/T-               | ATG/T-                  | ATG/T-           | ATG/T-                |  |
| ND3   | ATA/TA-             | ATT/T-              | ATA/TAA          | ATA/T-             | ATA/TAA            | ATT/TAA            | ATT/TA-               | ATT/TAA                 | ATA/TAG              | ATT/T-               | ATT/T-                  | ATT/T-           | ATT/T-                |  |
| ND5   | GTG/TA-             | ATT/T-              | ATG/T-           | ATT/T-             | ATT/T              | ATT/TAA            | ATT/T-                | ATT/T-                  | ATT/T-               | ATT/T-               | ATT/T-                  | ATT/T-           | ATT/T-                |  |
| ND4   | ATG/TAA             | ATG/TAA             | ATG/TAA          | ATG/TAA            | ATG/TAA            | ATG/TAA            | ATG/TAG               | ATG/TAA                 | ATG/T-               | ATG/TAA              | ATG/TAA                 | ATG/TAA          | ATG/TAA               |  |
| ND4L  | ATG/TAA             | ATT/TAA             | ATG/TAA          | GTG/TAA            | ATT/TAA            | ATG/TAA            | GTG/TAA               | ATT/TAG                 | GTG/TAA              | ATG/TAA              | ATG/TAA                 | ATG/TAA          | ATG/TAA               |  |
| ND6   | ATA/TAA             | ATA/TAA             | ATG/TAA          | ATT/TAA            | ATA/TAA            | ATA/TAA            | ATG/TAA               | ATA/TAA                 | ATT/TAA              | ATT/TAA              | ATT/TAA                 | ATT/TAA          | ATC/TAA               |  |
| CytB  | ATG/T-              | ATG/TAG             | ATG/TAA          | ATG/TAG            | ATG/T-             | ATG/TAA            | ATA/T-                | ATG/TAG                 | ATG/TAA              | ATG/TAA              | ATG/TAA                 | ATG/TAA          | ATG/TAA               |  |
| ND1   | ATA/TAA             | GTG/TAA             | GTG/TAA          | GTG/T-             | ATT/TAA            | ATG/TAG            | ATG/TAG               | ATA/TAA                 | GTG/TAG              | ATA/TAA              | ATA/TAA                 | ATA/TAA          | ATA/TAA               |  |

Unconventional start codons were highlighted by grey color.



**Table S7.** Primer pairs used in this study.

| No. Fragment | Primer ID | Nucleotide Sequence (5'-3') | Reference     |
|--------------|-----------|-----------------------------|---------------|
| 1            | TM-J210   | AATTAAGCTATTAGGTTTCATACCC   | [49]          |
|              | TW-N1284  | TTAACTTTGAAGGTTAATAGTTT     | [49]          |
| 2            | N2-J586   | CCATTCCATTTYTGATTTC         | [49]          |
|              | C1-N1738  | TTTATTCGTGGAAATGCTATGTC     | [49]          |
| 3            | F-1738    | TTCAGCCACCCTATCCCTA         | Present study |
|              | R-2130    | CGAGTGTCTACATCCATACCA       | Present study |
| 4            | C1-J2183  | CAACATTTATTTTGATTTTTGG      | [49]          |
|              | TL2-N3014 | TCCAATGCACTAATCTGCCATATT    | [49]          |
| 5            | C1-J2756  | ACATTTTTTCCTCAACATTT        | [49]          |
|              | C2-N3665  | CCACAAATTTCTGAACACTG        | [49]          |
| 6            | F-3665    | TCTAACCCAAAGTCAGCCC         | Present study |
|              | R-4552    | GGTCAAATGCTATGATGCC         | Present study |
| 7            | F-4552    | TGAAAGGACTAAGTTACCG         | Present study |
|              | R-4792    | TATGTGGTTGATGGAGGA          | Present study |
| 8            | F-4792    | ACAAGCCCTCTTATCAC           | Present study |
|              | R-6172    | AGGTTATGGATTCTGGGT          | Present study |
| 9            | TN-J6172  | AGAGGCAATTTATTGTTAATAA      | [49]          |
|              | N5-N7211  | TTAAGGCTTTATTATTTATATGTGC   | [49]          |
| 10           | F-7211    | GGAAGACCACACAAGGAAAT        | Present study |
|              | R-7572    | TTATTGGGAGGGACTCTGC         | Present study |
| 11           | N5-J7572  | AAACGGAAACTGAGCTCTCTTAGT    | [49]          |
|              | N4-N8727  | AAATCTTTAATTGCCTATTCTTC     | [49]          |
| 12           | N4-J8641  | CCAGAAGAACACAAACCATG        | [49]          |
|              | N4L-J9629 | GTTTGTGAGGGTGCAATAGG        | [49]          |
| 13           | F-9629    | CGCACTCAAACGCTCAGGCT        | Present study |
|              | R-11335   | CTACTGTGAGAAGTTGCCCTAC      | Present study |
| 14           | CB-J11335 | CATATTCAACCAGAATGATA        | [49]          |
|              | N1-N12067 | AATCGTTCTCCATTTGATTTTGC     | [49]          |
| 15           | N1-J11876 | CGAGGTAAAGTACCACGTACTION    | [49]          |
|              | N1-N12595 | GTTGGATTTCTAACTTTATTRGARG   | [49]          |
| 16           | N1-J12261 | TACCTCATAAGAAATAGTTTGAGC    | [49]          |
|              | LR-N13000 | TTACCTTAGGGATAACAGCGTAA     | [49]          |
| 17           | LR-J12888 | CCGGTCTGAACTCAGATCATGTA     | [49]          |
|              | LR-N13889 | ATTTATTGTACCTTTTGTATCAG     | [49]          |
| 18           | LR-J13342 | CCTTTGCACAGTCAAATACTGC      | [49]          |
|              | SR-N14220 | TTATGCACACATCGCCCGTC        | [49]          |
| 19           | SR-J14197 | GTAAAYCTACTTTGTTACGACTT     | [49]          |
|              | SR-N14745 | GTGCCAGCAAYCGCGTTATAC       | [49]          |
| 20           | F-14745   | ATTAATGAGAGTGACGGGCGAT      | Present study |
|              | R-15114   | TATGTGGTTGATGGAGGAGTAC      | Present study |
| 21           | F-15114   | ATGTCCTACTATCGTCAC          | Present study |
|              | R-210     | GGGATGAATGCAATTAGG          | Present study |

Table S8. Taxa used in this study.

| Order     | Infroorder   | Superfamily   | Family       | Species                            | GenBank Accession |
|-----------|--------------|---------------|--------------|------------------------------------|-------------------|
| Outgroup  |              |               |              |                                    |                   |
|           |              | Pentatomoidea | Cydnidae     | <i>Macroscytus subaeneus</i>       | NC_012457         |
|           |              |               | Pentatomidae | <i>Nezara viridula</i>             | NC_011755         |
| Ingroup   |              |               |              |                                    |                   |
| Hemiptera | Cimicomorpha | Reduvisioidea | Reduviidae   | <i>Agriosphodrus dohrni</i>        | NC_015842         |
|           |              |               |              | <i>Oncocephalus breviscutum</i>    | NC_022816         |
|           |              |               |              | <i>Sirthenea flayipes</i>          | HQ645959          |
|           |              |               |              | <i>Triatoma dimidiata</i>          | NC_002609         |
|           |              |               |              | <i>Valentia hoffmanni</i>          | NC_012823         |
|           |              |               |              | <i>Brontostoma colossus</i>        | NC_024745         |
|           |              |               |              | <i>Peirates lepturoides</i>        | NC_026672         |
|           |              |               |              | <i>Peirates arcuatus</i>           | NC_024264         |
|           |              |               |              | <i>Reduvius tenebrosus</i>         | Present study     |
|           |              | Miroidea      | Miridae      | <i>Adelphocoris fasciaticollis</i> | NC_023796         |
|           |              |               |              | <i>Apolygus lucorum</i>            | NC_023083         |
|           |              |               |              | <i>Adelphocoris nigritylus</i>     | NC_027144         |
|           |              |               |              | <i>Lygus hesperus</i>              | NC_024641         |
|           |              |               |              | <i>Lygus lineolaris</i>            | NC_021975         |
|           |              |               |              | <i>Nesidiocoris tenuis</i>         | NC_022677         |
|           |              |               | Tingidae     | <i>Corythucha ciliata</i>          | NC_022922         |
|           |              |               |              | <i>Pseudacysta perseae</i>         | KM278221          |
|           |              | Naboidea      | Nabidae      | <i>Alloeorhynchus bakeri</i>       | HM235722          |
|           |              |               |              | <i>Gorpis annulatus</i>            | JF907591          |
|           |              |               |              | <i>Gorpis humeralis</i>            | NC_019593         |
|           |              |               |              | <i>Himacerus apterus</i>           | JF927831          |
|           |              |               |              | <i>Nabis apicalis</i>              | JF907590          |
|           |              | Cimicoidea    | Anthocoridae | <i>Orius niger</i>                 | EU427341          |
